# Supplementary material
Source: PubMed Central journal article supplement (PMC10849465)
Supplement: NIHMS1962765-supplement-1.pdf [file NIHMS1962765-supplement-1.pdf]

**Supplementary Material**

**Supplementary Table S1. Multivariate analysis of radiographic progression-free survival by blinded independent central review in the *BRCA1/2* subgroup**

| <b>Model parameter</b>                   | <b>Model fit</b> |                | <b>HR</b>         |
|------------------------------------------|------------------|----------------|-------------------|
|                                          | Coeff (SE)       | <i>P</i> value | Estimate (95% CI) |
| Treatment (niraparib vs placebo)         | -0.69 (0.18)     | <0.0001        | 0.50 (0.35-0.71)  |
| Presence of visceral disease (no vs yes) | -0.75 (0.20)     | 0.0001         | 0.47 (0.32-0.69)  |
| Baseline PSA <sup>a</sup>                | 0.15 (0.04)      | 0.0001         | 1.16 (1.08-1.26)  |

CI, confidence interval; HR, hazard ratio; PSA, prostate-specific antigen; SE, standard error.

<sup>a</sup>The logarithmic value of PSA was used.

**Supplementary Table S2. Subsequent therapy for prostate cancer in the *BRCA1/2***

**subgroup<sup>a</sup>**

| Therapy, <i>n</i> (%)                | NIRA + AAP<br>( <i>n</i> = 113) | PBO + AAP<br>( <i>n</i> = 112) |
|--------------------------------------|---------------------------------|--------------------------------|
| Total                                | 35 (31.0)                       | 66 (58.9)                      |
| Chemotherapy                         | 28 (24.8)                       | 44 (39.3)                      |
| Docetaxel                            | 18 (15.9)                       | 36 (32.1)                      |
| Cabazitaxel                          | 8 (7.1)                         | 13 (11.6)                      |
| Carboplatin                          | 6 (5.3)                         | 4 (3.6)                        |
| Carboplatin/docetaxel                | 1 (0.9)                         | 1 (0.9)                        |
| Carboplatin:etoposide                | 1 (0.9)                         | 0                              |
| Cisplatin                            | 1 (0.9)                         | 2 (1.8)                        |
| Etoposide                            | 1 (0.9)                         | 1 (0.9)                        |
| Docetaxel/prednisone                 | 0                               | 1 (0.9)                        |
| Estramustine                         | 0                               | 1 (0.9)                        |
| Mitoxantrone                         | 0                               | 1 (0.9)                        |
| Vinorelbine                          | 0                               | 1 (0.9)                        |
| Other                                | 11 (9.7)                        | 18 (16.1)                      |
| Prednisone                           | 4 (3.5)                         | 9 (8.0)                        |
| Investigational drug                 | 3 (2.7)                         | 3 (2.7)                        |
| Lutetium (Lu 177)                    | 2 (1.8)                         | 2 (1.8)                        |
| Investigational antineoplastic drugs | 1 (0.9)                         | 2 (1.8)                        |
| Prednisolone                         | 1 (0.9)                         | 0                              |
| Radium Ra 223                        | 1 (0.9)                         | 1 (0.9)                        |
| Dexamethasone                        | 0                               | 4 (3.6)                        |
| Nivolumab                            | 0                               | 1 (0.9)                        |
| Novel AR-targeted therapy            | 7 (6.2)                         | 11 (9.8)                       |
| Enzalutamide                         | 7 (6.2)                         | 10 (8.9)                       |
| Apalutamide                          | 0                               | 1 (0.9)                        |
| Hormonal                             | 2 (1.8)                         | 9 (8.0)                        |
| Abiraterone                          | 2 (1.8)                         | 6 (5.4)                        |
| Bicalutamide                         | 0                               | 2 (1.8)                        |
| Flutamide                            | 0                               | 1 (0.9)                        |
| PARPi                                | 1 (0.9)                         | 22 (19.6)                      |
| Olaparib                             | 1 (0.9)                         | 18 (16.1)                      |
| Fluzoparib                           | 0                               | 1 (0.9)                        |
| Niraparib                            | 0                               | 2 (1.8)                        |
| Rucaparib                            | 0                               | 1 (0.9)                        |
| Talazoparib                          | 0                               | 1 (0.9)                        |

AAP, abiraterone acetate plus prednisone; AR, androgen receptor; NIRA, niraparib; /, poly

adenosine diphosphate-ribose polymerase inhibitor; PBO, placebo.

<sup>a</sup>Recurrent medications were counted only once per patient.

**Supplementary Table S3. Other endpoints in the *BRCA1/2* subgroup**

|                                         | <b>Median, months</b>           |                                | <b>HR (95% CI)</b>            | <b>Nominal<br/>P value</b> |
|-----------------------------------------|---------------------------------|--------------------------------|-------------------------------|----------------------------|
|                                         | NIRA + AAP<br>( <i>n</i> = 113) | PBO + AAP<br>( <i>n</i> = 112) |                               |                            |
| Time to PSA progression                 | 18.4                            | 9.2                            | 0.48 (0.33-0.70)              | <0.0001                    |
| Objective response rates                | 28 (50.0) <sup>a</sup>          | 15 (31.3) <sup>a</sup>         | 1.60 (0.98-2.62) <sup>b</sup> | 0.053                      |
| OS multivariate analysis                | NA                              | NA                             | 0.68 (0.45-1.05)              | 0.0793                     |
| PSA response, <sup>c</sup> <i>n</i> (%) | 93 (82.3)                       | 77 (68.8)                      | 1.21 (1.02-1.43) <sup>b</sup> | 0.023                      |
| Confirmed                               | 89 (78.8)                       | 73 (65.2)                      |                               |                            |
| Unconfirmed                             | 4 (3.5)                         | 4 (3.6)                        |                               |                            |

AAP, abiraterone acetate with prednisone; AR, androgen receptor; CI, confidence interval; HR, hazard ratio; NA, not available; NIRA, niraparib; OS, overall survival; PBO, placebo; PSA, prostate-specific antigen.

<sup>a</sup>Responder is presented as *n* (%) and represents a complete or partial response, neither of which had to be confirmed.

<sup>b</sup>Relative risk (95% CI); relative risk >1 favors active treatment.

<sup>c</sup>PSA response rate was defined as the proportion of patients achieving a PSA decline of ≥50% and confirmed at 3-4 weeks later according to Prostate Cancer Working Group 3 criteria by week 12 and during the treatment period.

**Supplementary Table S4. Multivariate analysis of OS by blinded independent central review in the HRR+ population**

| <b>Model parameter</b>                          | <b>Model fit</b> |                | <b>HR</b>         |
|-------------------------------------------------|------------------|----------------|-------------------|
|                                                 | Coeff (SE)       | <i>P</i> value | Estimate (95% CI) |
| Treatment (niraparib vs placebo)                | -0.21 (0.15)     | 0.1821         | 0.82 (0.60-1.10)  |
| PSA <sup>a</sup>                                | 0.09 (0.04)      | 0.0287         | 1.09 (1.01-1.18)  |
| Lactate dehydrogenase <sup>a</sup>              | 0.52 (0.15)      | 0.0003         | 1.69 (1.27-2.25)  |
| Alkaline phosphatase                            | 0.28 (0.10)      | 0.0054         | 1.32 (1.09-1.61)  |
| Age                                             | 0.03 (0.01)      | 0.0017         | 1.03 (1.01-1.05)  |
| ECOG PS (0 vs 1)                                | -0.34 (0.16)     | 0.0339         | 0.71 (0.52-0.97)  |
| Number of bone lesions at baseline (≤10 vs >10) | -0.60 (0.19)     | 0.0015         | 0.55 (0.38-0.80)  |
| Presence of visceral disease (yes vs no)        | 0.43 (0.18)      | 0.0161         | 1.54 (1.08-2.18)  |

CI, confidence interval; ECOG PS, Eastern Cooperative Oncology Group performance status;

HR, hazard ratio; HRR, homologous recombination repair; OS, overall survival; PSA, prostate-specific antigen; SE, standard error.

<sup>a</sup>The logarithmic value of PSA and lactate dehydrogenase was used.

**Supplementary Table S5. Key efficacy endpoints by gene alteration in the HRR+ population**

| Gene                                                                 | Treatment group | N (events) | rPFS             | TSP        | TCC               | OS         |                  |         |                   |
|----------------------------------------------------------------------|-----------------|------------|------------------|------------|-------------------|------------|------------------|---------|-------------------|
|                                                                      |                 |            | HR (95% CI)      | N (events) | HR (95% CI)       | N (events) | HR (95% CI)      |         |                   |
| HRR-Fanconi Anemia<br>( <i>PALB2</i> , <i>BRIP1</i> , <i>FANCA</i> ) | NIRA + AAP      | 17 (10)    | 0.68 (0.29-1.61) | 17 (5)     | 0.61 (0.19-2.02)  | 17 (6)     | 0.73 (0.22-2.39) | 17 (8)  | 0.71 (0.26-1.89)  |
|                                                                      | PBO + AAP       | 14 (11)    |                  | 14 (6)     |                   | 14 (5)     |                  | 14 (8)  |                   |
| <i>PALB2</i>                                                         | NIRA + AAP      | 8 (6)      | 0.54 (0.14-2.03) | 8 (1)      | 0.22 (0.02-2.42)  | 8 (3)      | 0.56 (0.05-6.41) | 8 (4)   | 0.46 (0.10-2.08)  |
|                                                                      | PBO + AAP       | 4 (4)      |                  | 4 (2)      |                   | 4 (1)      |                  | 4 (3)   |                   |
| <i>BRIP1</i>                                                         | NIRA + AAP      | 4 (2)      | 0.44 (0.07-2.65) | 4 (2)      | 1.14 (0.10-13.27) | 4 (2)      | NE (NE)          | 4 (3)   | 0.40 (0.07-2.47)  |
|                                                                      | PBO + AAP       | 4 (3)      |                  | 4 (1)      |                   | 4 (0)      |                  | 4 (3)   |                   |
| <i>FANCA</i>                                                         | NIRA + AAP      | 5 (2)      | 0.73 (0.13-4.06) | 5 (2)      | 1.23 (0.17-8.74)  | 5 (1)      | 0.42 (0.04-4.03) | 5 (1)   | 1.41 (0.09-22.82) |
|                                                                      | PBO + AAP       | 6 (4)      |                  | 6 (3)      |                   | 6 (4)      |                  | 6 (2)   |                   |
| HRR associated ( <i>CHEK2</i> + <i>HDAC2</i> )                       | NIRA + AAP      | 20 (12)    | 0.77 (0.36-1.68) | 20 (4)     | 0.55 (0.16-1.88)  | 20 (6)     | 0.76 (0.26-2.27) | 20 (8)  | 0.63 (0.26-1.55)  |
|                                                                      | PBO + AAP       | 23 (14)    |                  | 23 (7)     |                   | 23 (7)     |                  | 23 (12) |                   |
| <i>CHEK2</i>                                                         | NIRA + AAP      | 18 (11)    | 0.87 (0.37-2.01) | 18 (3)     | 0.48 (0.12-1.94)  | 18 (4)     | 0.49 (0.14-1.69) | 18 (7)  | 0.66 (0.25-1.75)  |
|                                                                      | PBO + AAP       | 20 (11)    |                  | 20 (6)     |                   | 20 (7)     |                  | 20 (10) |                   |
| <i>HDAC2</i>                                                         | NIRA + AAP      | 2 (1)      | 0.71 (0.06-8.02) | 2 (1)      | 0.71 (0.04-11.79) | 2 (2)      | NE (NE)          | 2 (1)   | 0.44 (0.04-5.13)  |
|                                                                      | PBO + AAP       | 3 (3)      |                  | 3 (1)      |                   | 3 (0)      |                  | 3 (2)   |                   |
| <i>ATM</i>                                                           | NIRA + AAP      | 43 (32)    | 1.26 (0.74-2.13) | 43 (9)     | 0.79 (0.33-1.90)  | 43 (9)     | 0.47 (0.21-1.06) | 43 (17) | 1.13 (0.56-2.30)  |
|                                                                      | PBO + AAP       | 42 (25)    |                  | 42 (11)    |                   | 42 (16)    |                  | 42 (14) |                   |
| <i>CDK12</i>                                                         | NIRA + AAP      | 11 (7)     | 0.89 (0.34-2.36) | 11 (4)     | 1.05 (0.28-3.94)  | 11 (5)     | 1.32 (0.38-4.56) | 11 (6)  | 1.30 (0.45-3.81)  |
|                                                                      | PBO + AAP       | 16 (10)    |                  | 16 (5)     |                   | 16 (6)     |                  | 16 (9)  |                   |

AAP, abiraterone acetate with prednisone; CI, confidence interval; HR, hazard ratio; HRR, homologous recombination repair; NE, not estimable; NIRA, niraparib; OS, overall survival; PBO, placebo; PSA, prostate-specific antigen; rPFS, radiographic progression-free survival; TCC, time to initiation of cytotoxic chemotherapy; TSP, time to symptomatic progression.

Note: Nonestimable HRs are due to few or no events.

**Supplementary Figure S1. CONSORT diagram.**

AAP, abiraterone acetate with prednisone; HRR, homologous recombination repair; NIRA, niraparib; PBO, placebo. <sup>a</sup>Included 3166 patients who entered prescreening *de novo* (did not have known HRR status).

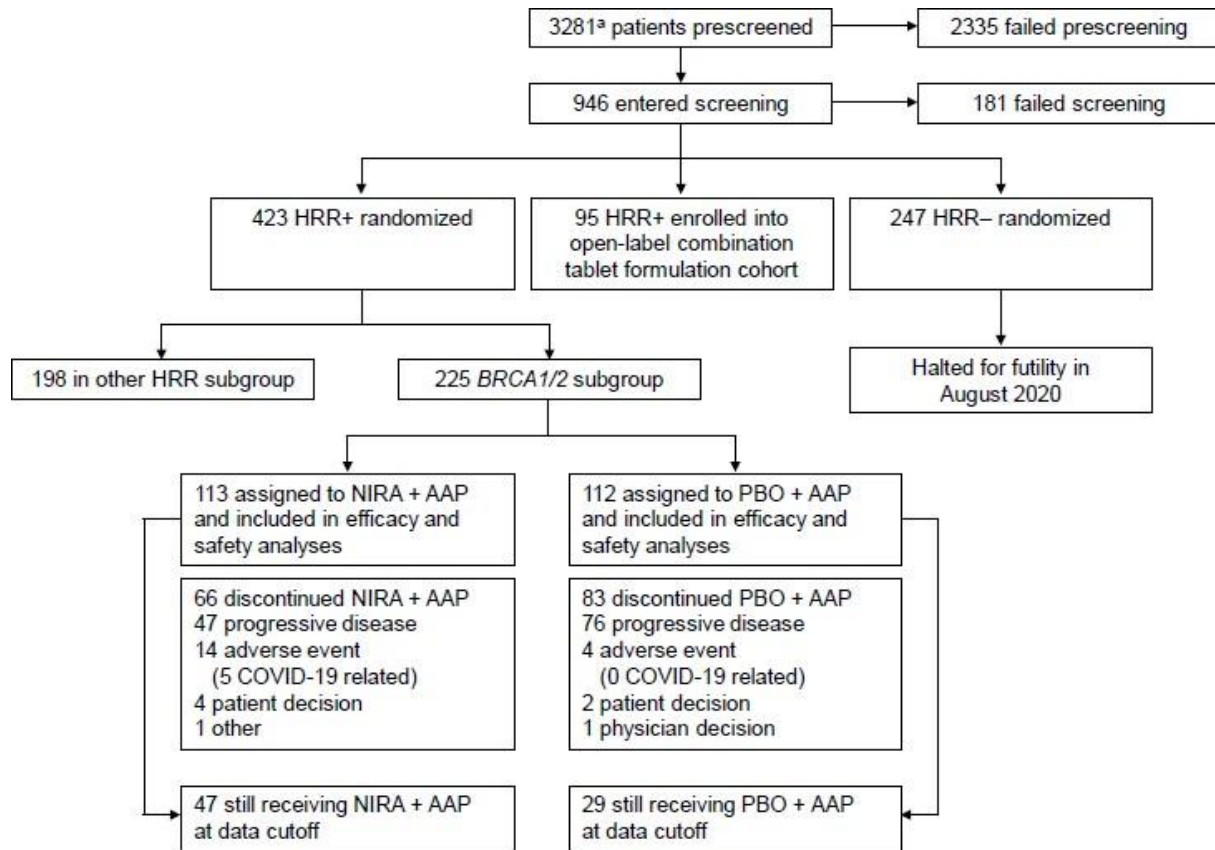

**Supplementary Figure S2. Radiographic progression-free survival at IA2 assessed (A) in the *BRCA1/2* subgroup as analyzed by investigator review, (B) in the HRR+ population as analyzed by blinded independent central review, and (C) in the HRR+ population as analyzed by investigator review.**

AAP, abiraterone acetate with prednisone; CI, confidence interval; HR, hazard ratio; HRR, homologous recombination repair; IA2, second interim analysis; NIRA, niraparib; PBO, placebo.

<sup>a</sup>Nominal *P* value.

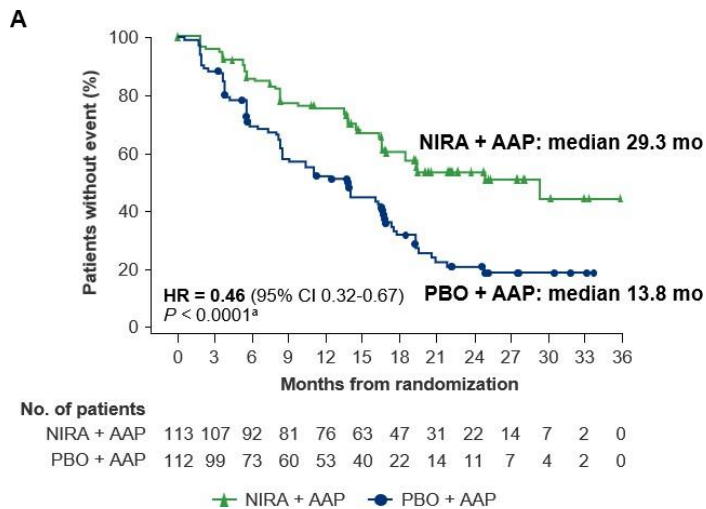

**B**

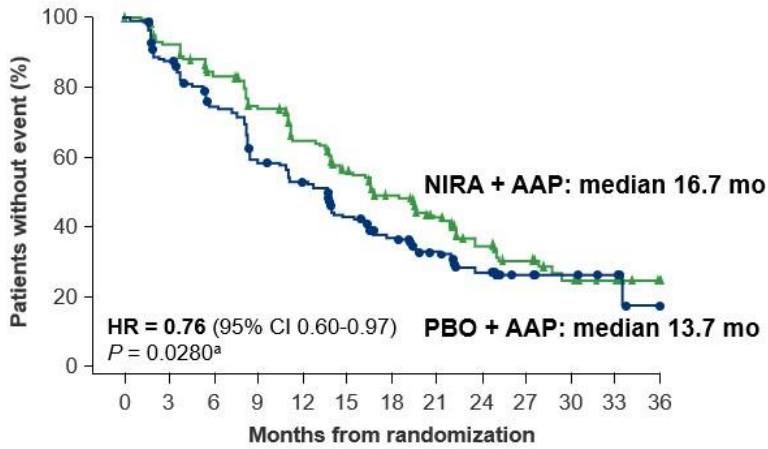

**No. of patients**

|            |     |     |     |     |     |    |    |    |    |    |    |   |   |
|------------|-----|-----|-----|-----|-----|----|----|----|----|----|----|---|---|
| NIRA + AAP | 212 | 192 | 168 | 145 | 122 | 99 | 77 | 54 | 37 | 25 | 13 | 6 | 0 |
| PBO + AAP  | 211 | 182 | 149 | 117 | 103 | 78 | 57 | 44 | 30 | 19 | 13 | 9 | 0 |

▲ NIRA + AAP ● PBO + AAP

**C**

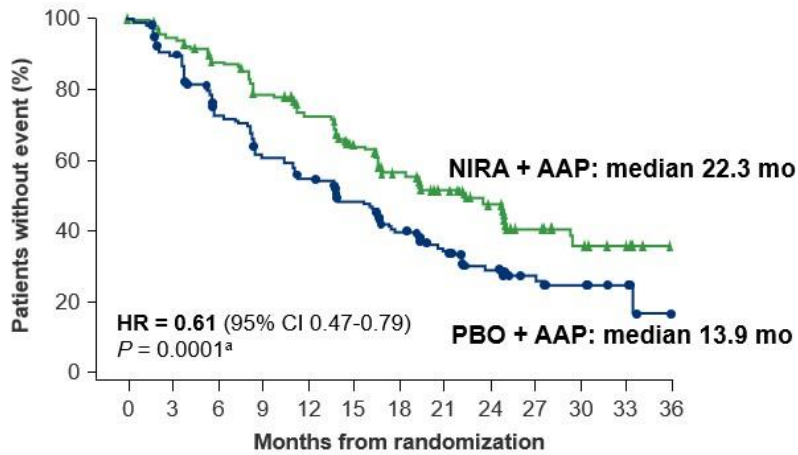

**No. of patients**

|            |     |     |     |     |     |     |    |    |    |    |    |   |   |
|------------|-----|-----|-----|-----|-----|-----|----|----|----|----|----|---|---|
| NIRA + AAP | 212 | 197 | 176 | 154 | 138 | 113 | 89 | 66 | 46 | 28 | 15 | 7 | 0 |
| PBO + AAP  | 211 | 187 | 145 | 120 | 107 | 85  | 62 | 49 | 34 | 22 | 13 | 9 | 0 |

▲ NIRA + AAP ● PBO + AAP



**Supplementary Figure S3. Radiographic progression-free survival by baseline patient and disease characteristics for the *BRCA1/2* subgroup.**

AAP, abiraterone acetate with prednisone; AR, androgen receptor; BPI-SF, Brief Pain Inventory-Short Form; CI, confidence interval; ECOG PS, Eastern Cooperative Oncology Group performance status; HR, hazard ratio; NE, not evaluable; PAC, Pacific; PSA, prostate-specific antigen.

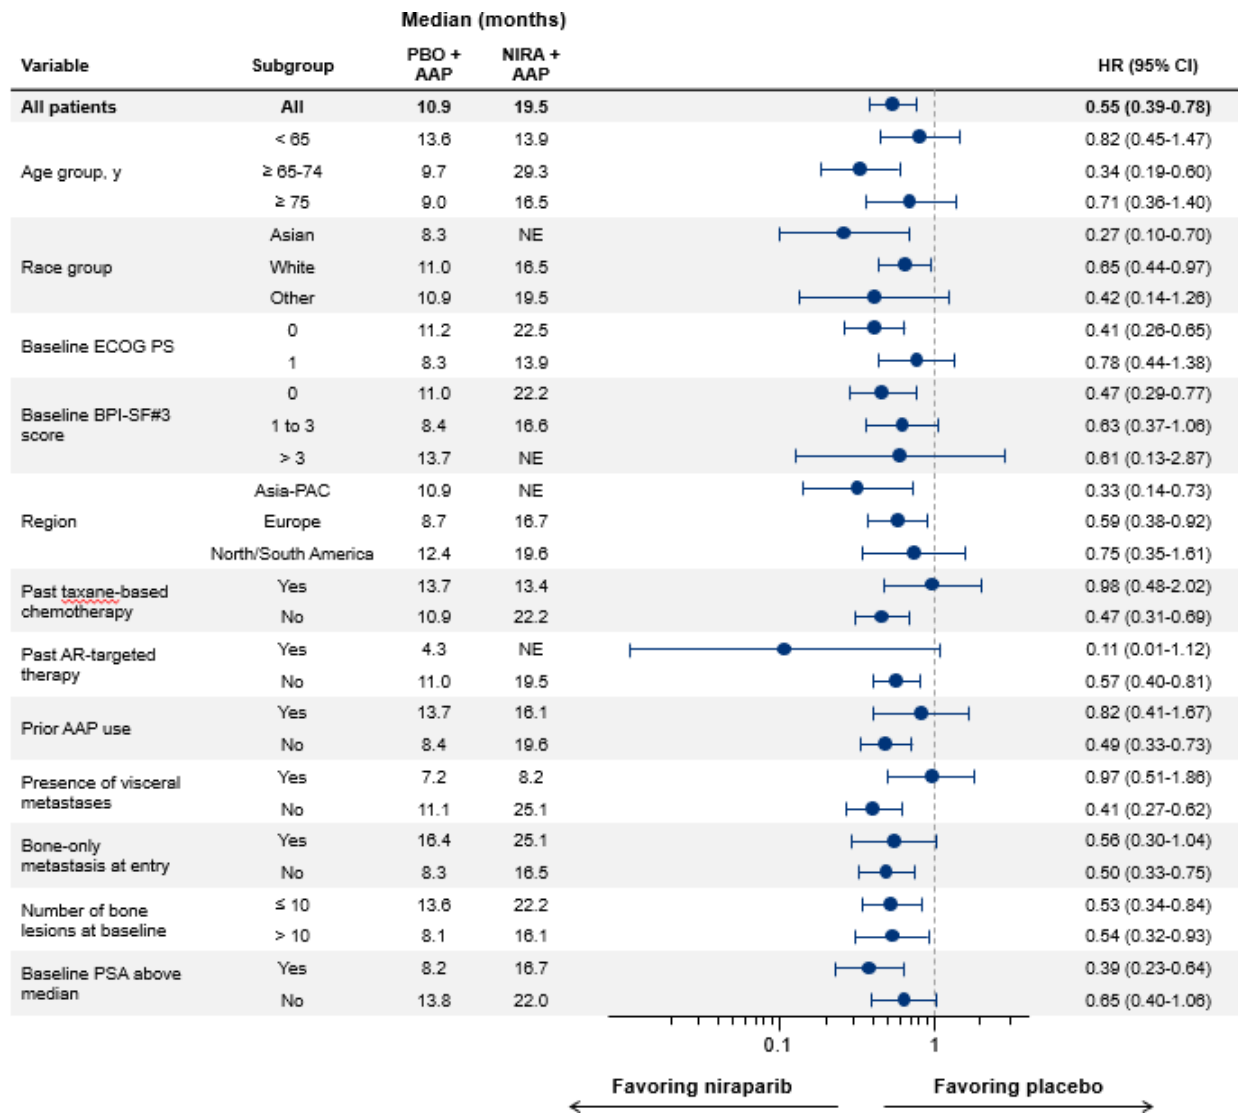

**Supplementary Figure S4. Time to symptomatic progression at IA2 in the HRR+ population.**

AAP, abiraterone acetate with prednisone; CI, confidence interval; HR, hazard ratio; HRR, homologous recombination repair; IA2, second interim analysis; NE, not evaluable; NIRA, niraparib; PBO, placebo.

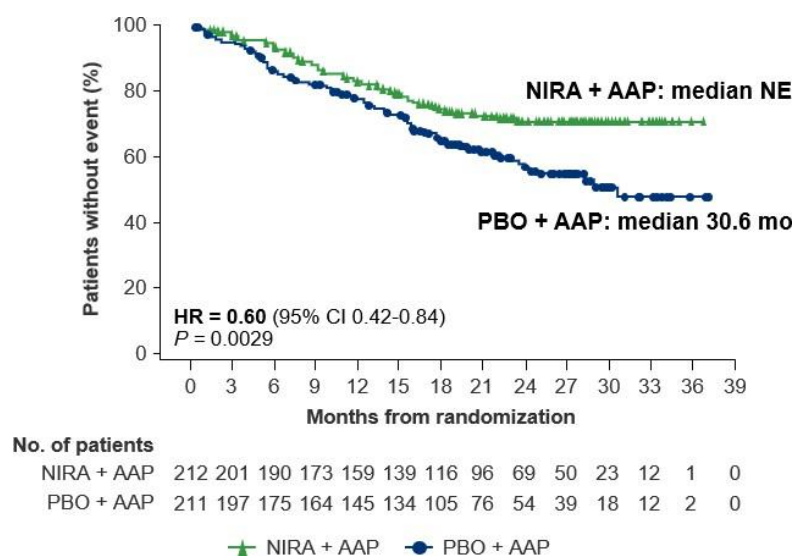

**Supplementary Figure S5. Time to initiation of cytotoxic chemotherapy at IA2 in the HRR+ population.**

AAP, abiraterone acetate with prednisone; CI, confidence interval; HR, hazard ratio; HRR, homologous recombination repair; IA2, second interim analysis; NE, not evaluable; NIRA, niraparib; PBO, placebo.

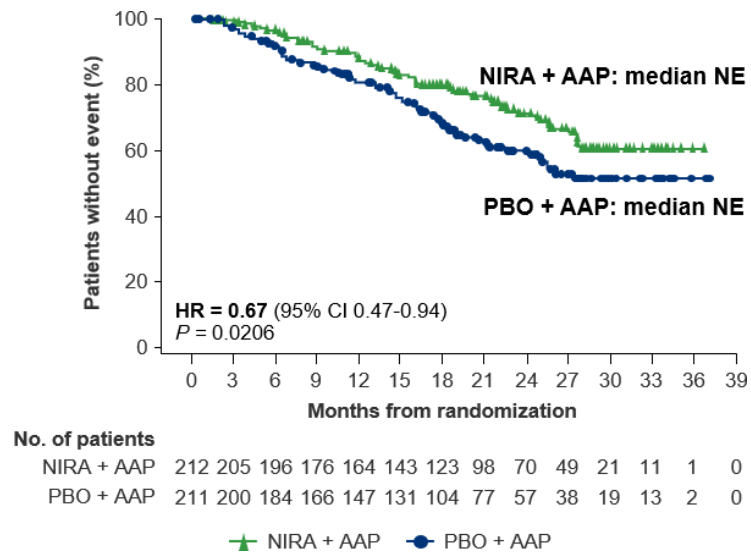

**Supplementary Figure S6. Overall survival at IA2 in the HRR+ population by (A) stratified analysis and (B) IPCW analysis.**

AAP, abiraterone acetate with prednisone; CI, confidence interval; HR, hazard ratio; HRR, homologous recombination repair; IA2, second interim analysis; IPCW, inverse probability censoring weighting; NIRA, niraparib; PBO, placebo. <sup>a</sup>Nominal *P* value.

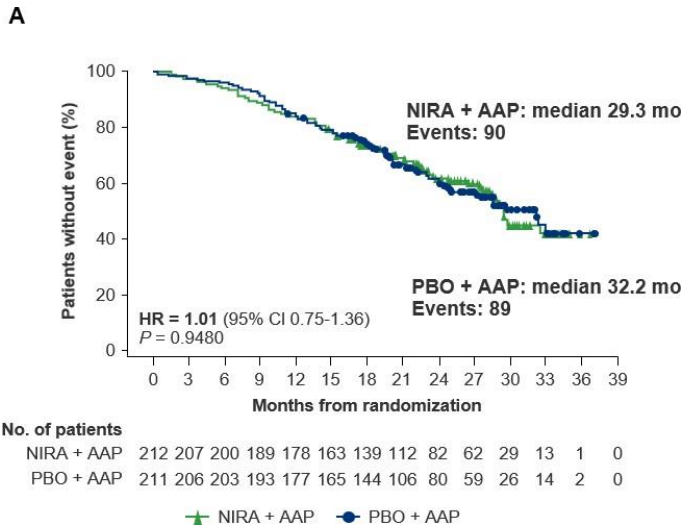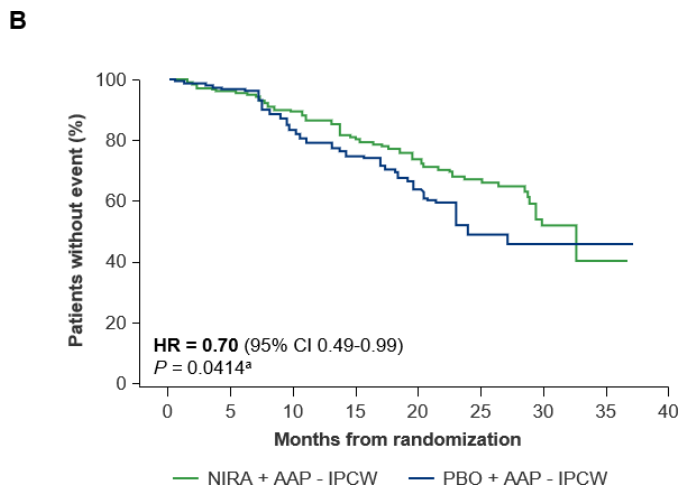

**Supplementary Figure S7. Additional endpoints at IA2 in the *BRCA1/2* subgroup, including (A) time to pain progression and (B) time to BPI-SF pain interference.**

AAP, abiraterone acetate with prednisone; BPI-SF, Brief Pain Inventory-Short Form; CI, confidence interval; HR, hazard ratio; IA2, second interim analysis; NE, not evaluable; NIRA, niraparib; PBO, placebo. <sup>a</sup>Nominal *P* value.

**A**

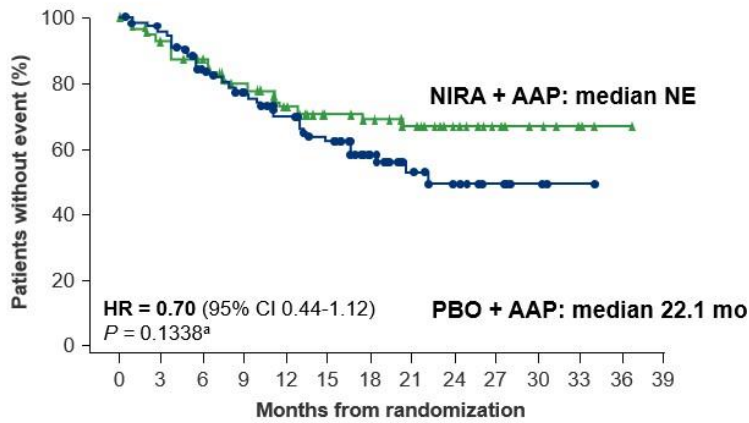

No. of patients

|            |     |     |    |    |    |    |    |    |    |    |   |   |   |   |
|------------|-----|-----|----|----|----|----|----|----|----|----|---|---|---|---|
| NIRA + AAP | 113 | 97  | 87 | 73 | 62 | 50 | 39 | 28 | 19 | 12 | 7 | 4 | 1 | 0 |
| PBO + AAP  | 112 | 104 | 86 | 72 | 60 | 50 | 34 | 17 | 12 | 8  | 3 | 1 | 0 | 0 |

▲ NIRA + AAP ● PBO + AAP

**B**

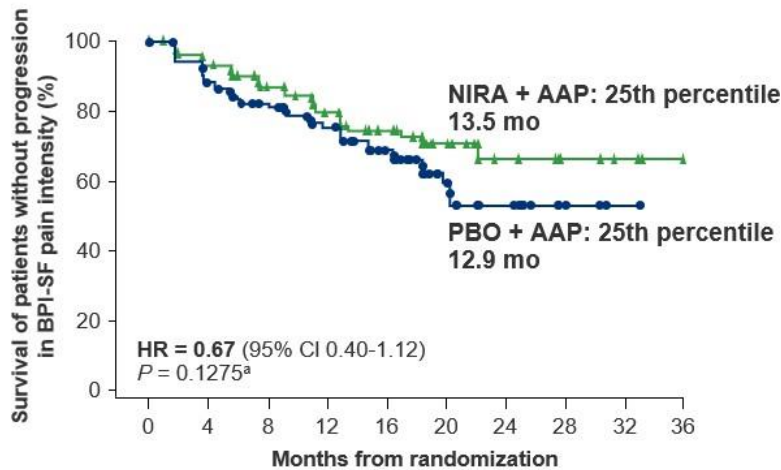

No. of patients

|            |     |    |    |    |    |    |    |   |   |   |
|------------|-----|----|----|----|----|----|----|---|---|---|
| NIRA + AAP | 113 | 93 | 76 | 64 | 50 | 31 | 13 | 6 | 4 | 0 |
| PBO + AAP  | 112 | 88 | 75 | 62 | 49 | 21 | 12 | 3 | 1 | 0 |

▲ NIRA + AAP ● PBO + AAP
